# Supplementary material
Source: PubMed Central journal article supplement (PMC3043370)
Supplement: NIHMS269123-supplement-1_si_001.pdf [file NIHMS269123-supplement-1_si_001.pdf]

## Supporting Information

### Enzymatic Deamination of the Epigenetic Base *N*-6-Methyladenine

Siddhesh S. Kamat, Hao Fan, J. Michael Sauder, Stephen K. Burley, Brian K. Shoichet, Andrej Sali, and Frank M. Raushel

*Cloning of Bh0637 from B. halodurans (C-125).* The DNA sequence for Bh0637 from *B. halodurans C-125* was cloned (gil15613200). The gene for Bh0637 was amplified utilizing the primer pair 5'-AAAGAGAATCATATGTGTGAACAAAAGTATCGCTGGACGAAAAAGC-3' and 5'-AGAAGAAAGCTTTTAACGCATAATTGAAGGAAAGAGAACTGTTTTCTTATGAAC-3'. *NdeI* and *HindIII* restriction sites were introduced into the forward and the reverse primers, respectively. The PCR product was purified with a PCR cleanup system (Qiagen), digested with *NdeI* and *HindIII*, and ligated into a pET30a(+) vector which was previously digested with *NdeI* and *HindIII*. Colony PCR was used to verify whether the colony had the gene-insert prior to sequencing. The cloned gene fragment was sequenced to verify the fidelity of the PCR amplification.

*Protein Expression and Purification.* The recombinant plasmid bearing the gene for Bh0637 was transformed into *E. coli* BL21 (DE3) competent cells by electroporation. A single colony was grown overnight at 37 °C in 5 mL of LB medium containing 50 µg/mL kanamycin. Five mL aliquots were used to inoculate 6 L of the same medium. The cell cultures were grown at 37 °C and induced with 0.5 mM isopropyl-β-thiogalactoside (IPTG) when the A<sub>600</sub> reached ~0.6 in the presence of 1.0 mM MnCl<sub>2</sub>. The cells were centrifuged and then resuspended in 50 mM HEPES, pH 7.5, containing 0.1 mg/mL phenylmethylsulfonyl fluoride and lysed by sonication. The soluble proteins were separated from the cell debris by centrifugation at 12000 x

g for 15 minutes at 4 °C. The nucleic acids were removed by dropwise addition of 2% w/v protamine sulfate. After centrifugation, solid ammonium sulfate was added to 60% saturation to the supernatant solution. The precipitated protein was dissolved in buffer and then applied to a High Load 26/60 Superdex 200 prep grade gel filtration column (GE HealthCare). The active fractions were pooled and loaded onto a ResourceQ column (6 mL) and eluted with a gradient of NaCl in 20 mM Hepes, pH 7.5. The protein purity was confirmed by SDS-PAGE.

*Iron-Free Expression.* The iron content of our LB medium was determined to be approximately 36  $\mu\text{M}$  by inductively coupled plasma mass spectrometry (ICPMS). The iron-specific chelator 2,2'-dipyridyl was used to remove this metal during protein expression. A single colony was grown overnight at 37 °C in 5 mL of LB medium containing 50  $\mu\text{g}/\text{mL}$  kanamycin and then added to 6 L of the same medium. When the  $A_{600}$  reached 0.15 – 0.20, 50  $\mu\text{M}$  2,2'-dipyridyl was added to sequester the iron, followed by the addition of 0.5 mM IPTG and 1.0 mM  $\text{MnCl}_2$  when the  $A_{600}$  was  $\sim 0.6$ .

**Table S1: Proteins in subgroup 2 in cog 1001**

| Organism                                                   | Locus tag      | Gi number |
|------------------------------------------------------------|----------------|-----------|
| <i>Bacillus halodurans</i> C-125                           | Bh0637         | 15613200  |
| <i>Bacillus clausii</i> KSM-K16                            | ABC1075        | 56962849  |
| <i>Geobacillus kaustophilus</i> HTA426                     | GK0271         | 56418806  |
| <i>Anoxybacillus flavithermus</i> WK1                      | Aflv_0242      | 212638091 |
| <i>Geobacillus thermodenitrificans</i> NG80-2              | GTNG_0250      | 138893926 |
| <i>Bacillus cereus</i> Q1                                  | BCQ_2842       | 222096502 |
| <i>Lysinibacillus sphaericus</i> C3-41                     | Bsph_0221      | 169825824 |
| <i>Bacillus licheniformis</i> ATCC 14580                   | BL01492        | 52079144  |
| <i>Bacillus amyliquefaciens</i> FZB42                      | RBAM_006960    | 154685151 |
| <i>Bacillus subtilis</i> str. 168                          | BSU06560       | 16077724  |
| <i>Bacillus pumilus</i> SAFR-032                           | BPUM_0617      | 157691407 |
| <i>Bacillus cereus</i> ATCC 14579                          | BC3012         | 30021127  |
| <i>Bacillus cereus</i> B4264                               | BCB_4264_A3029 | 218233799 |
| <i>Exiguobacterium sibiricum</i> 255-15                    | Exig_0459      | 172056498 |
| <i>Bacillus cereus</i> G9842                               | BCG9842_B2218  | 218898088 |
| <i>Bacillus thuringiensis</i> str. Al Hakam                | BALH_2712      | 118478348 |
| <i>Bacillus cereus</i> 03BB102                             | BCA_3097       | 225864990 |
| <i>Bacillus cereus</i> E33L                                | BCZK2753       | 52142489  |
| <i>Bacillus thuringiensis</i> serovar konkukian str. 97-27 | BT9727_2766    | 49480044  |
| <i>Bacillus cereus</i> AH187                               | BACH_A3083     | 217960451 |

|                                                |                |           |
|------------------------------------------------|----------------|-----------|
| <i>Bacillus anthracis str. 'Ames Ancestor'</i> | GBAA3032       | 47528323  |
| <i>Bacillus anthracis str. Ames</i>            | BA_3032        | 30262986  |
| <i>Bacillus anthracis str. Sterne</i>          | BAS2818        | 49185824  |
| <i>Bacillus cereus AH820</i>                   | BCAH820_3026   | 218904142 |
| <i>Bacillus weihenstephanensis KBAB4</i>       | BcerKBAB4_2823 | 163940762 |
| <i>Oceanobacillus iheyensis HTE831</i>         | OB0751         | 23098206  |
| <i>Picrophilus torridus DSM 9790</i>           | PTO1085        | 48478157  |
| <i>Brevibacillus brevis NBRC 100599</i>        | BBR47_06120    | 226310199 |
| <i>Rubrobacter xylanophilus DSM 9941</i>       | Rxyl_1744      | 108804579 |
| <i>Geobacillus thermodenitrificans NG80-2</i>  | GTNG_1889      | 138895539 |
| <i>Geobacillus kaustophilus HTA426</i>         | GK1989         | 56420524  |
| <i>Geobacillus metallireducens</i>             | GS-15          | 78223406  |

**Chart S1: Compounds tested as substrates for Bh0637 and Bsu06560**

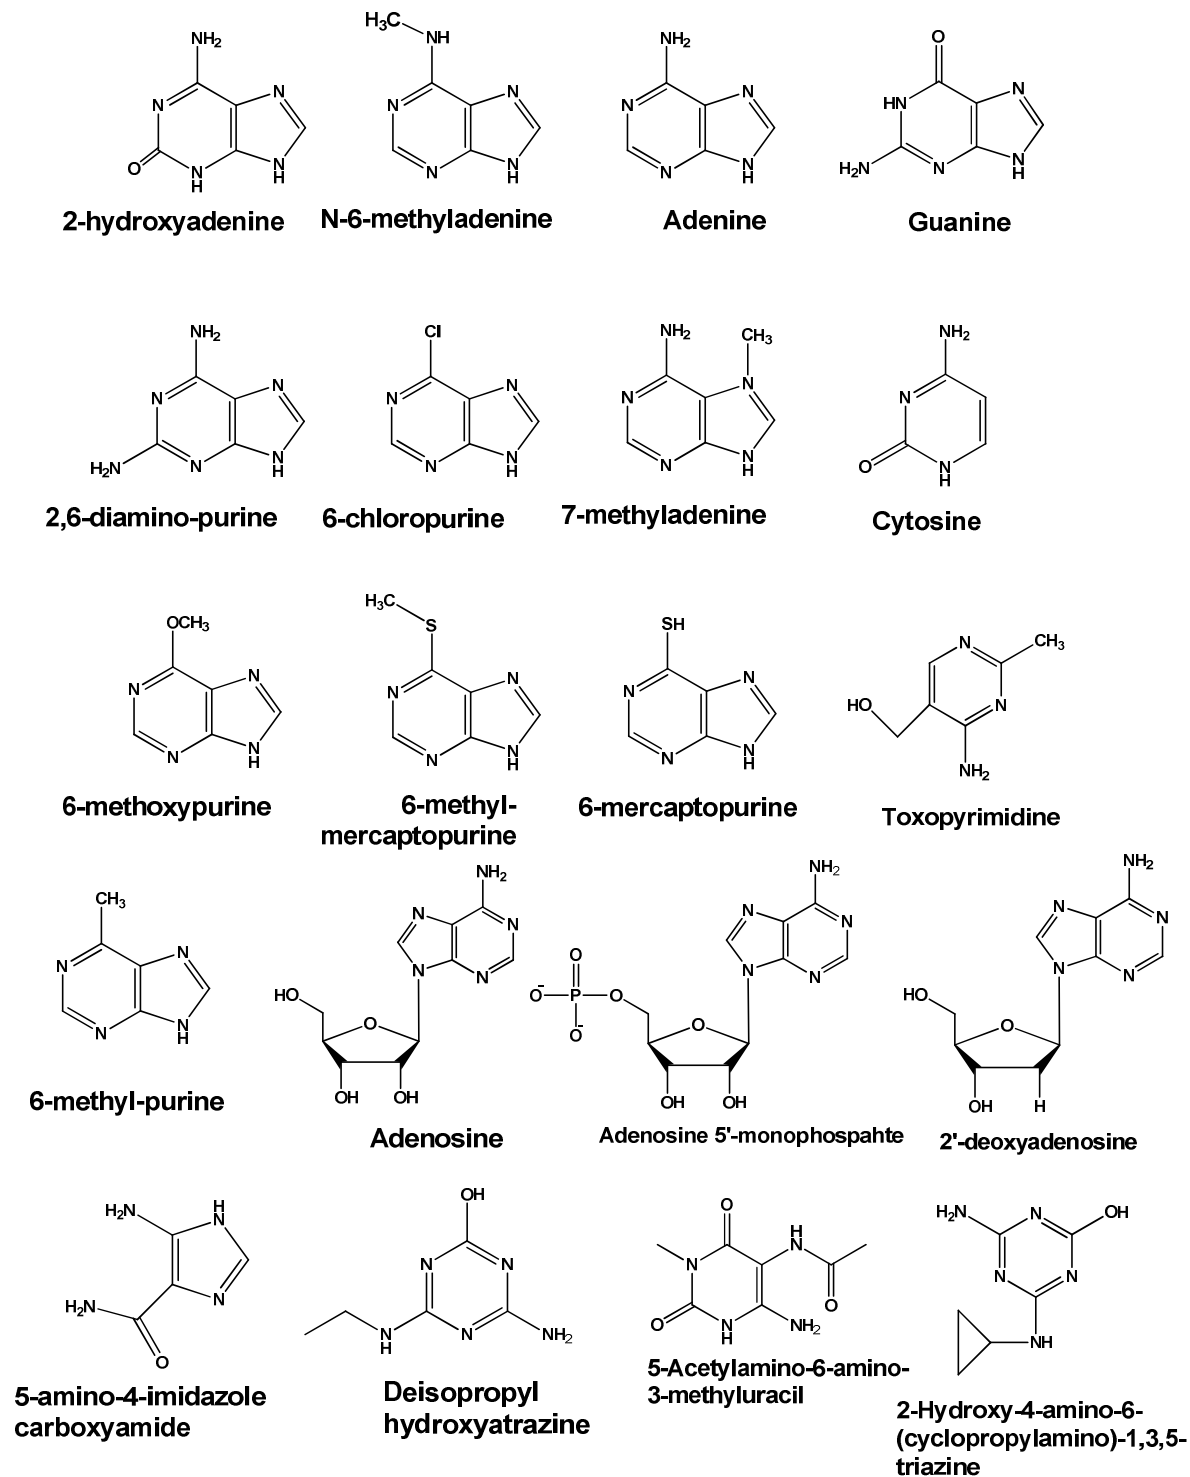

Scheme S1: Sequence Alignment between Bh0637 and Atu4426

Sequence alignment between Bh0637 and Atu4426 (PDB code 3NQB, A chain). Residues that are within 4 Å of the binuclear metal center are highlighted.

```

Bh0637  9 TKKQIR-----QLAVVRGEMAPT LVLKNATY LNSVRGKWL DANIWI 50
3nqbA  9 EPADLNDDTLRARAVAAARGDQRFDVLI TGGTLVDVVTGELRPADIGI 56

Bh0637  51 YQDRIVYV--GQDMPAKL DDETEVVD CGQQVIVPGYIEHFAH- PFQL 94
3nqbA  57 VGALIASVHEPAS-----RRDAAQVIDAGGAYVSPGLIDT HMHIES SM 99

Bh0637  95 YNPHSFANYAAAMGTTTTLINDNLMFFLALEK K KALS MIESLDEL P SSM 142
3nqbA  100 ITPAAYAAAVVARGVTTI VWD PHEFGNVHGV D GVRWAAKAIENLPLRA 147

Bh0637  143 YWWCYRYPQTE--MNDEEGHFLNSKIKEWLEHPLVVQGGELT SWPKVI 188
3nqbA  148 ILLAPSCVPSAPGLERGGADFDAAILADLLSWPEIGGIAEIMNMRGVI 195

Bh0637  189 TGDDGILHWMQETRRLRKP IEGH FPGASEKTLTQMSLLGVTSDHEAMT 236
3nqbA  196 ERDPRMSGIVQAGLAAEKLVCGHARGLKNADLNAFMAAGVSSDHELVS 243

Bh0637  237 GEEVIRRLDLGYMTSLRHSSIRSDLAKILREMKELGIDDFSRCLTTD 284
3nqbA  244 GEDLMAKLRAGLTIELR-GSHDHLLEPFVAAALNTLGHLPQVTTLCTD 289

Bh0637  285 GSPPSFYEQ-GIMDRLIKIALDEGIPPKDAYGMATYYVARYYGLDYEL 331
3nqbA  290 DVFPDDLQGGGLDDVVRRLVRYGLKPEWALRAATLNAAQRLGRSD-L 336

Bh0637  332 GMIA PGRI AHLNFDNVFNPVPTSVLAKGQWVVRDQGRYGS DSVFPWE 379
3nqbA  337 GLIAAGRRA DIVVFEDLNGFSARHV LASGRAVAEGGRMLVDIPTCDT- 383

Bh0637  380 DFGMKRLTIDWDL SVDELHFSMPMG-----IELV-NSVILKPYQVSV 420
3nqbA  384 TVLKGSMKL-PLRMANDFLVKS---QGAKVRLATIDRPRFTQWGETEA 427

Bh0637  421 EASRDTLAEDHDE--CFFLLLDKHG--KWKIP TMIKGF AKKV SGLAS 463
3nqbA  428 DVKDG FVVPPE--GATMISVTHRHGMAEPTTKTGFLTGWGRWNGAFAT 473

Bh0637  464 SFSTTG-DIILIGKCIQDMI VAFNALKQQGGGIVLVENGEV ISNIPLE 510
3nqbA  474 TVSHDSHNLTVFGGNAGDMALAA NAVIGTGGGM AVASEGKVTAI LPLP 521

Bh0637  511 IMGLLSSKPMEEVMEE EKKFVKALRE-RGYEHD-DPIYSLLFFSSTHL 556
3nqbA  522 LSGLVSDAPLEEVARAFEDLREAVGKVVEWQPPYL VFKACFGATLACN 569

Bh0637  557 PYIRVTQRGIYDVHKKTVLFP SIMR 581
3nqbA  570 IGPHQTD MGIADVLTGKVMESPIE 594

```
